# Supplementary material
Source: PubMed Central journal article supplement (PMC4135823)
Supplement: AAC.02630-14_zac009143191so1.pdf [file AAC.02630-14_zac009143191so1.pdf]

Table S1: PCR conditions and primers used in the present study

| PCR | Primer pair      | Annealing temperature (°C) | Primer 5'-3'                                               | Amplicon size (bp) | Reference                    |
|-----|------------------|----------------------------|------------------------------------------------------------|--------------------|------------------------------|
| 1   | 1216F/18R        | 55                         | ttcagcaggatgtgatt/<br>ccaagggcaataaggtaagatc               | 1650               | This study                   |
| 2   | aadEF/14R        | 53                         | accgtttatatctaataatgatgactgg/<br>ccactcgcacatacaaaattcatat | 1735               | This study                   |
| 3   | 13F/12R          | 50                         | aaattccgaaagaagcaattcaagc/<br>cgatttgaagagagcatccatattc    | 1440               | This study                   |
| 4   | 16F/17R          | 55                         | tgaagaactaaaacgccatataaac/<br>gcatcttcttgaacatcaagcaatgat  | 2032               | This study                   |
| 5   | ABCF/ ABCR       | 50                         | cttttcatatgaaggaagtatg/<br>caagctgtaattcgttcac             | 1604               | This study                   |
| 6   | LinBup/ LinBdown | 49                         | ctacctattgtttgtgaa/<br>taacgttactctcctattc                 | 961                | Bozdogan<br>B. <i>et al.</i> |

|   |          |    |                                                     |  |            |
|---|----------|----|-----------------------------------------------------|--|------------|
| 7 | 3TF/9SPF | 52 | gttatggattgcaaagtcac/<br>cctgtaagtattgctagt         |  | This study |
| 8 | 15F/31R  | 60 | ccccggaatatccatcatgt/<br>tgagtgatacatgacatatcttagcg |  | This study |

**Bozdogan B, Berrezouga L, Kuo MS, Yurek DA, Farley KA, Stockman BJ, Leclercq R.** 1999. A new resistance gene, *linB*, conferring resistance to lincosamides by nucleotidylation in *Enterococcus faecium* HM1025. *Antimicrob. Agents Chemother.* **43**:925-929.
